# Supplementary material for: Environmental drivers of benthic biodiversity in Collins Bay (King George Island), Antarctica: evidence for small- scale community structuring
Source: Research Square preprint supplement (doi:10.21203/rs.3.rs-6908361/v1), 2025-06-24
Supplement: Supplementary file 1 [file 2b4db3946a5f42bd80133e62.docx]

**Supplementary information**

**Biodiversity over the entire depth range**

Supplementary Table 1: Fuzzy coding specification, adjusted from Robinson et al.83

| **Trait** | **Scale** | **Description/Categories** |
| --- | --- | --- |
| Trophic Group | Categorical | Autotrophs, Grazer, Filter Feeder, Predator, Scavenger, Deposit Feeder |
| Adult Mobility | Ordinal | 0: Sessile, 1: Limited Movement (vagile), 2: Slow movement, 3: Fast free movement |
| Larval Type | Ordinal | 1: Direct Development (Egg Laying/Brooders), 2: Lecithotrophic larvae, 3: Planktotrophic larvae |

Supplementary Table 2: Functional traits for taxon, adjusted from Robinson et al.83

| **Phylum** | **Order** | **Genus** | **Feeding mode** | **Larvae dispersal** | **Mobility** |
| --- | --- | --- | --- | --- | --- |
| **Annelida** | Annelida | Annelida sp. 1 | P/S | Planktotrophic larvae | 2 |
|  |  | Annelida sp. 2 | P/S | Planktotrophic larvae | 2 |
|  | Sabellida | Perkinsiana littoralis | FF | Lecithotrophic larvae | 0 |
| **Ascidiacea** | Ascidians | Ascidian sp. | FF | Lecithotrophic larvae | 0 |
|  |  | Clavelina lepadiformis | FF | Lecithotrophic larvae | 0 |
|  |  | Colonial ascidean sp. 2 | FF | Lecithotrophic larvae | 0 |
|  |  | Dideminidae sp. | FF | Lecithotrophic larvae | 0 |
|  |  | Mogula sp. | FF | Lecithotrophic larvae | 0 |
|  |  | Pareungyriodes arnbackae | FF | Lecithotrophic larvae | 0 |
|  |  | Polyclinidae sp. 1 | FF | Lecithotrophic larvae | 0 |
|  | Stolidobranchia | Ascidian green | FF | Lecithotrophic larvae | 0 |
|  |  | Ascidian purple | FF | Lecithotrophic larvae | 0 |
|  |  | Ascidian red | FF | Lecithotrophic larvae | 0 |
|  |  | Cnemidocarpa verrucosa | FF | Lecithotrophic larvae | 0 |
|  |  | Mogula sp. | FF | Lecithotrophic larvae | 0 |
|  |  | Pyura setosa | FF | Lecithotrophic larvae | 0 |
|  |  | Pyura sp. | FF | Lecithotrophic larvae | 0 |
| **Bryozoa** | Bryozoa | Beania sp. | FF | Lecithotrophic larvae | 0 |
|  |  | Bryozoa sp. 1 | FF | Lecithotrophic larvae | 0 |
|  |  | Bryozoa sp. 2 | FF | Lecithotrophic larvae | 0 |
|  | Cyclostomatida | Hornea sp. | FF | Lecithotrophic larvae | 0 |
| **Cnidaria** | Actiniaria | Actiniaria sp. 1 | P | Lecithotrophic larvae | 0 |
|  |  | Actiniaria sp. 4 | P | Lecithotrophic larvae | 0 |
|  |  | Actiniaria sp. 5 | P | Lecithotrophic larvae | 0 |
|  |  | Artemidatis victrix | P | Lecithotrophic larvae | 0 |
|  |  | Dactylanthus sp. | P | Lecithotrophic larvae | 0 |
|  |  | Edwardsiella sp. | P | Lecithotrophic larvae | 0 |
|  |  | Glyphoperidium bursa | P | Lecithotrophic larvae | 0 |
|  |  | Hormosoma scotti | P | Lecithotrophic larvae | 0 |
|  |  | Isotealia antarctica | P | Lecithotrophic larvae | 0 |
|  |  | Stomphia selaginella | P | Lecithotrophic larvae | 0 |
|  | Octocorallia | Gersemia antarctica | P | Lecithotrophic larvae | 0 |
|  | Scleralcyocea | Gorgoniidae sp. 2 | P | Brooding | 0 |
|  |  | Gorgoniidae sp. 3 | P | Brooding | 0 |
|  |  | Gorgoniidae sp. 4 | P | Brooding | 0 |
|  |  | Gorgoniidae sp. 5 | P | Brooding | 0 |
|  |  | Gorgoniidae sp. 6 | P | Brooding | 0 |
|  |  | Gorgoniidae sp. 7 | P | Brooding | 0 |
|  |  | Malacobelemnon sp. | P | Brooding | 0 |
|  |  | Malacobelemnon sp. 2 | P | Brooding | 0 |
|  |  | Onogorgia nodosa | P | Brooding | 0 |
|  |  | Primnoella sp. | P | Brooding | 0 |
| **Ctenophora** | Platyctenida | Lyrocteis flavopallidus | FF | Larvae | 0 |
| **Echino-dermata** | Dendrochirotida | Staurocucumis liouvillei | SF | Larvae | 1 |
| Echinoidea | Ctenocidaris gigantea | FF | Planktotrophic larvae | 2 |
| Forcipulatida | Cuenotaster sp. | P/S/DF | Brooding/Lecithotrophic larvae | 2 |
|  | Diplasterias brandti | P/S/DF | Brooding/Lecithotrophic larvae | 2 |
|  |  | Diplasterias brucei | P/S/DF | Lecithotrophic larvae | 2 |
|  |  | Forcipulatida sp. | P/S/DF | Brooding/Lecithotrophic larvae | 2 |
|  |  | Labidiaster annulatus | P/S/DF | Brooding/Lecithotrophic larvae | 2 |
|  |  | Neosmilaster georgianus | P/S/DF | Brooding/Lecithotrophic larvae | 2 |
|  |  | Neosmilaster sp. | P/S | Lecithotrophic larvae | 2 |
|  | Holothuroidea | Bathyplotes bongraini | DF | Larvae | 2 |
|  |  | Cucumaria sp. | FF | Brooding | 1 |
|  |  | Echinopsolus acanthocola | FF | Brooding | 1 |
|  |  | Heterocucumis steineni | FF/S | Lecithotrophic larvae | 1 |
|  |  | Holothuroidea sp. 1 | FF | Brooding | 1 |
|  |  | Holothuroidea sp. 2 | FF | Brooding | 1 |
|  |  | Holothuroidea sp. 3 | FF | Brooding | 1 |
|  |  | Holothuroidea sp. 4 | FF | Brooding | 1 |
|  | Ophiurida | Ophionotus victoriae | P/S/DF/O | Larvae | 2 |
|  |  | Ophiurida sp. 1 | P/S/DF/O | Larvae | 2 |
|  | Spatangoida | Sterechinus neumayeri | P/S/O/DF/G | Pelagic embryos/Larvae | 2 |
|  | Valvatida | Acodontaster sp. | P | Larvae/Pelagic embryos/Lecithotrophic larvae | 2 |
|  |  | Cuenotaster involutus | P/S | Lecithotrophic larvae | 2 |
|  |  | Mactoptychaster accrescens | P | Larvae | 2 |
|  |  | Neosmilaster georgianus | P/S/DF | Brooding/Lecithotrophic larvae | 2 |
|  |  | Odontaster validus | O/P/DF/FF/G | Larvae | 2 |
|  |  | Perkinsianasp. | P/S/O/DF/G | Pelagic embryos/ Larvae | 2 |
|  |  | Perknaster aurorae | P/S | Larvae | 2 |
|  |  | Perknaster sp. | P/S/O/DF/G | Pelagic embryos/Larvae | 2 |
|  |  | Perknaster sp. 2 | P/S/O/DF/G | Pelagic embryos/Larvae | 2 |
|  |  | Pteraster rugatus | P/S | Lecithotrophic larvae | 2 |
|  |  | Sterechinus neumayeri | P/S/O/DF/G | Pelagic embryos/Larvae | 2 |
|  |  | Valvatida sp. | P/S/O/DF/G | Pelagic embryos/Larvae | 2 |
| **Hydrozoa** | Hydrozoa | Hydrozoa sp. | FF | Larvae | 0 |
| **Mollusca** | Bivalvia | Bivalvia sp. 1 | SF/FF | Lecithotrophic larvae | 0 |
|  |  | Bivalvia sp. 2 | SF/FF | Lecithotrophic larvae | 0 |
|  |  | Bivalvia sp. 3 | SF/FF | Lecithotrophic larvae | 0 |
|  |  | Laternula elliptica | SF/FF | Lecithotrophic larvae | 0 |
|  | Gastropoda | Gastropoda sp. 2 | P | Egg laying | 2 |
|  |  | Gastropoda sp. 3 | P | Egg laying | 2 |
|  |  | Gastropoda sp. 4 | P | Egg laying | 2 |
|  |  | Newnesia sp. | P | Egg laying | 2 |
|  | Littorinimorpha | Amauropsis rossiana | P | Egg laying | 2 |
|  |  | Marseniopsis mollis | P | Egg laying | 2 |
|  | Neogastropoda | Neobuccinum eatoni | S | Egg laying | 2 |
|  | Nuculanida | Aequiyoldia eightsii | S/DF | Egg laying | 1 |
|  |  | Aequiyoldia eightsii | S/DF | NA | 1 |
|  | Nudibranchia | Aegires albus | P | Egg laying | 2 |
|  |  | Austrodoris kerguelensis | P | Egg laying | 2 |
|  |  | Cuthona crinita | P | Egg laying | 2 |
|  |  | Nudibranchia sp. | P | Egg laying | 2 |
|  | Patellogastropoda | Nacella concinna | G | Larvae | 2 |
|  | Pectinida | Adamussium colbecki | SF | Larvae | 1 |
| **Nemertea** | Heteronemertea | Parborlasia corrugatus (L) | P/S | Lecithotrophic larvae | 2 |
|  |  | Parborlasia corrugatus (S) | P/S | Lecithotrophic larvae | 2 |
| **Perciformes** | Actinopterygii | Actinopterygii sp. | P/S/O | Egg laying | 3 |
|  |  | Artedidraco sp. | P/S | Egg laying | 3 |
|  |  | Channichthyidae | P/S/O | Egg laying | 3 |
|  |  | Notothenia rossii | P/S/O | Egg laying | 3 |
|  |  | Notothenia sp. | P/S/O | Egg laying | 3 |
| **Polychaeta** | Polychaeta | Flabegraviera mundata | FF | Lecithotrophic larvae | 0 |
|  |  | Polychaeta sp. | FF | Lecithotrophic larvae | 0 |
|  |  | Serpulidae spp. | FF | Lecithotrophic larvae | 0 |
|  |  | Terebellid polychaete | FF | Lecithotrophic larvae | 0 |
| **Porifera** |  | Dendrilla antarctica | SF | Larvae | 1 |
|  | Hadromerida | Suberites topsenti | FF | Lecithotrophic larvae | 0 |
|  | Haplosclerida | Haliclona sp. | FF | Lecithotrophic larvae | 0 |
|  |  | Hemigellius fimbriatus | FF | Lecithotrophic larvae | 0 |
|  |  | Microxina benedeni | FF | Lecithotrophic larvae | 0 |
|  | Lyssacinosida | Rossella antarctica | FF | Lecithotrophic larvae | 0 |
|  |  | Rossella levis | FF | Lecithotrophic larvae | 0 |
|  |  | Rossella podagrosa | FF | Lecithotrophic larvae | 0 |
|  | Poecilosclerida | Mycale acerata | FF | Lecithotrophic larvae | 0 |
|  | Polymastiida | Polymastia invaginata | FF | Lecithotrophic larvae | 0 |
|  |  | Polymastiidae sp. | FF | Lecithotrophic larvae | 0 |
|  | Porifera | Bioluminescence 1 | FF | Lecithotrophic larvae | 0 |
|  |  | Bioluminescence 2 | FF | Lecithotrophic larvae | 0 |
|  |  | Haliclona sp. | FF | Lecithotrophic larvae | 0 |
|  |  | Polymastia invaginata | FF | Lecithotrophic larvae | 0 |
|  |  | Porifera sp. 1 | FF | Lecithotrophic larvae | 0 |
|  |  | Porifera sp. 10 | FF | Lecithotrophic larvae | 0 |
|  |  | Porifera sp. 11 | FF | Lecithotrophic larvae | 0 |
|  |  | Porifera sp. 12 | FF | Lecithotrophic larvae | 0 |
|  |  | Porifera sp. 13 | FF | Lecithotrophic larvae | 0 |
|  |  | Porifera sp. 14 | FF | Lecithotrophic larvae | 0 |
|  |  | Porifera sp. 15 | FF | Lecithotrophic larvae | 0 |
|  |  | Porifera sp. 16 | FF | Lecithotrophic larvae | 0 |
|  |  | Porifera sp. 18 | FF | Lecithotrophic larvae | 0 |
|  |  | Porifera sp. 19 | FF | Lecithotrophic larvae | 0 |
|  |  | Porifera sp. 2 | FF | Lecithotrophic larvae | 0 |
|  |  | Porifera sp. 21 | FF | Lecithotrophic larvae | 0 |
|  |  | Porifera sp. 4 | FF | Lecithotrophic larvae | 0 |
|  |  | Porifera sp. 5 | FF | Lecithotrophic larvae | 0 |
|  |  | Porifera sp. 6 | FF | Lecithotrophic larvae | 0 |
|  |  | Porifera sp. 7 | FF | Lecithotrophic larvae | 0 |
|  |  | Porifera sp. 8 | FF | Lecithotrophic larvae | 0 |
|  |  | Porifera sp. 9 | FF | Lecithotrophic larvae | 0 |
|  | Suberitida | Homaxinella balfourensis | FF/SF | Lecithotrophic larvae | 0 |
|  |  | Homaxinella sp. | FF/SF | Lecithotrophic larvae | 0 |
|  |  | Sphaerotylus antarcticus | FF | Lecithotrophic larvae | 0 |
|  |  | Sphaerotylus sp. | FF | Lecithotrophic larvae | 0 |
|  |  | Suberites camitus | FF/SF | Lecithotrophic larvae | 0 |
|  |  | Suberites topsenti | FF | Lecithotrophic larvae | 0 |
|  | Tetractinellida | Antarctotetilla leptoderma | FF | Larvae/Rely on bud-like propagules | 0 |
|  |  | Cinachyra antarctica | FF | Larvae/Rely on bud-like propagules | 0 |
|  |  | Tetillidae sp. | FF | Lecithotrophic larvae | 0 |
| **Tunicata** | Aplousobranchia | Clavelina lepadiformis | FF | Lecithotrophic larvae | 0 |
|  | Tunicata | Tunicate sp. | FF | Egg laying | 1 |

Supplementary Table 3: Animal species counts per genus across 10 m depth bins in stations A3 & A4. Numbers indicate the total count of taxa within each bin, and percentages represent each taxon’s contribution to the total within that bin. Averages per sample are calculated per depth bin ± SD.

| **Phylum** | **Order** | **Genus** | **Depth (m)** | | | | | | | |
| --- | --- | --- | --- | --- | --- | --- | --- | --- | --- | --- |
|  |  |  | **0-10** | **10-20** | **20-30** | **30-40** | **40-50** | **50-60** | **60-70** | **70-80** |
| **Annelida** | **Annelida** | Annelida (n = 1) |  |  | 1 (0.2%) |  |  |  |  |  |
|  | **Sabellida** | Perkinsiana (n = 165) |  |  |  |  | 1 (1%) | 2 (0.3%) | 42 (2.1%) | 120 (3.7%) |
| **Arthropoda** | **Pycnogonida** | Pycnogonida (n = 9) |  |  | 1 (0.2%) |  |  | 3 (0.5%) | 3 (0.2%) | 2 (0.1%) |
| **Ascidiacea** | **Ascidians** | Clavelina (n = 18) |  |  |  |  |  |  | 18 (0.9%) |  |
|  |  | Colonial (n = 183) |  |  |  |  |  | 16 (2.7%) | 108 (5.4%) | 59 (1.8%) |
|  |  | Dideminidae (n = 82) |  |  |  |  |  | 25 (4.3%) | 14 (0.7%) | 43 (1.3%) |
|  |  | Mogula (n = 66) |  |  |  |  |  | 2 (0.3%) | 18 (0.9%) | 46 (1.4%) |
|  |  | Pareungyriodes (n = 18) |  |  |  |  |  | 1 (0.2%) | 5 (0.3%) | 12 (0.4%) |
|  |  | Polyclinidae (n = 19) |  |  |  |  |  | 4 (0.7%) | 10 (0.5%) | 5 (0.2%) |
|  | **Stolidobranchia** | Ascidian (n = 386) |  |  | 5 (1.2%) | 3 (1.4%) | 4 (3.9%) | 11 (1.9%) | 92 (4.6%) | 271 (8.4%) |
|  |  | Cnemidocarpa (n = 398) |  |  |  |  |  | 46 (7.9%) | 108 (5.4%) | 244 (7.6%) |
|  |  | Mogula (n = 119) |  |  | 1 (0.2%) |  | 1 (1%) | 79 (13.6%) | 34 (1.7%) | 4 (0.1%) |
|  |  | Pyura (n = 1) |  |  |  |  |  |  |  | 1 (0%) |
| **Bivalvia** | **Bivalvia** | Laternula (n = 63) | 1 (2.2%) | 1 (0.7%) | 6 (1.4%) |  | 1 (1%) | 42 (7.2%) |  | 12 (0.4%) |
| **Bryozoa** | **Bryozoa** | Beania (n = 4) |  |  |  |  |  | 1 (0.2%) | 3 (0.2%) |  |
|  |  | Bryozoa (n = 87) |  |  | 1 (0.2%) |  |  | 18 (3.1%) | 64 (3.2%) | 4 (0.1%) |
|  | **Cyclostomatida** | Hornea (n = 1) |  |  |  |  |  |  |  | 1 (0%) |
| **Cnidaria** | **Actiniaria** | Edwardsiella (n = 4) |  | 2 (1.4%) | 2 (0.5%) |  |  |  |  |  |
|  |  | Hormosoma (n = 4) |  |  | 1 (0.2%) |  |  |  | 3 (0.2%) |  |
|  | **Scleralcyocea** | Gorgoniidae (n = 82) |  |  |  |  |  |  | 65 (3.3%) | 17 (0.5%) |
|  |  | Malacobelemnon (n = 330) |  |  |  |  |  | 32 (5.5%) | 263 (13.2%) | 35 (1.1%) |
|  |  | Primnoella (n = 80) |  |  |  |  |  | 19 (3.3%) | 51 (2.6%) | 10 (0.3%) |
| **Ctenophora** | **Platyctenida** | Lyrocteis (n = 23) |  |  |  |  |  | 2 (0.3%) | 12 (0.6%) | 9 (0.3%) |
| **Echinodermata** | **Dendrochirotida** | Staurocucumis (n = 6) |  |  |  |  |  | 1 (0.2%) | 4 (0.2%) | 1 (0%) |
|  | **Echinoidea** | Ctenocidaris (n = 30) |  |  |  |  |  | 3 (0.5%) | 14 (0.7%) | 13 (0.4%) |
|  | **Forcipulatida** | Cuenotaster (n = 18) |  | 3 (2.1%) | 9 (2.2%) |  |  |  | 3 (0.2%) | 3 (0.1%) |
|  |  | Diplasterias (n = 66) | 1 (2.2%) | 7 (4.8%) | 15 (3.6%) | 4 (1.8%) | 2 (1.9%) | 2 (0.3%) | 19 (1%) | 16 (0.5%) |
|  |  | Forcipulatida (n = 4) |  |  |  |  |  |  | 1 (0.1%) | 3 (0.1%) |
|  |  | Labidiaster (n = 17) |  |  | 3 (0.7%) | 3 (1.4%) |  |  | 4 (0.2%) | 7 (0.2%) |
|  |  | Neosmilaster (n = 104) | 1 (2.2%) | 12 (8.3%) | 44 (10.5%) | 3 (1.4%) |  | 7 (1.2%) | 25 (1.3%) | 12 (0.4%) |
|  | **Holothuroidea** | Bathyplotes (n = 1) |  |  |  |  |  |  | 1 (0.1%) |  |
|  |  | Cucumaria (n = 2) |  |  |  |  |  |  | 2 (0.1%) |  |
|  |  | Echinopsolus (n = 24) |  | 6 (4.1%) | 12 (2.9%) | 1 (0.5%) |  |  |  | 5 (0.2%) |
|  |  | Heterocucumis (n = 8) |  | 3 (2.1%) | 5 (1.2%) |  |  |  |  |  |
|  |  | Holothuroidea (n = 6) |  |  |  |  |  |  | 1 (0.1%) | 5 (0.2%) |
|  | **Ophiurida** | Ophionotus (n = 80) |  |  | 8 (1.9%) | 16 (7.3%) | 20 (19.4%) | 1 (0.2%) | 6 (0.3%) | 29 (0.9%) |
|  |  | Ophiurida (n = 616) |  | 1 (0.7%) | 6 (1.4%) | 2 (0.9%) | 4 (3.9%) | 123 (21.1%) | 344 (17.2%) | 136 (4.2%) |
|  | **Spatangoida** | Sterechinus (n = 3) |  |  |  |  |  |  | 2 (0.1%) | 1 (0%) |
|  | **Valvatida** | Acodontaster (n = 3) |  |  |  | 1 (0.5%) | 2 (1.9%) |  |  |  |
|  |  | Cuenotaster (n = 4) |  |  |  |  |  |  | 4 (0.2%) |  |
|  |  | Mactoptychaster (n = 8) |  |  | 6 (1.4%) |  | 1 (1%) |  |  | 1 (0%) |
|  |  | Neosmilaster (n = 44) | 2 (4.3%) | 2 (1.4%) | 14 (3.3%) |  |  | 2 (0.3%) | 8 (0.4%) | 16 (0.5%) |
|  |  | Odontaster (n = 126) | 1 (2.2%) | 31 (21.4%) | 72 (17.2%) |  | 1 (1%) | 1 (0.2%) | 7 (0.4%) | 13 (0.4%) |
|  |  | Perkinsiana sp. (n = 7) |  |  | 2 (0.5%) |  |  |  |  | 5 (0.2%) |
|  |  | Perknaster (n = 14) |  |  | 1 (0.2%) | 1 (0.5%) |  | 1 (0.2%) | 7 (0.4%) | 4 (0.1%) |
|  |  | Pteraster (n = 4) |  |  |  |  |  |  | 4 (0.2%) |  |
|  |  | Sterechinus (n = 67) |  |  |  |  |  | 6 (1%) | 36 (1.8%) | 25 (0.8%) |
|  |  | Valvatida (n = 15) |  |  | 9 (2.2%) |  | 1 (1%) |  | 1 (0.1%) | 4 (0.1%) |
| **Hydrozoa** | **Hydrozoa** | Hydrozoa (n = 1) |  |  |  | 1 (0.5%) |  |  |  |  |
| **Mollusca** | **Gastropoda** | Newnesia (n = 381) | 9 (19.6%) | 41 (28.3%) | 123 (29.4%) | 155 (71.1%) | 42 (40.8%) |  |  | 11 (0.3%) |
|  | **Littorinimorpha** | Amauropsis (n = 8) |  | 1 (0.7%) | 1 (0.2%) |  |  | 1 (0.2%) | 2 (0.1%) | 3 (0.1%) |
|  |  | Marseniopsis (n = 19) |  |  |  |  |  |  | 11 (0.6%) | 8 (0.2%) |
|  | **Neogastropoda** | Neobuccinum (n = 8) |  | 1 (0.7%) | 2 (0.5%) |  | 2 (1.9%) |  | 2 (0.1%) | 1 (0%) |
|  | **Nuculanida** | Aequiyoldia (n = 4) |  |  |  |  |  |  | 1 (0.1%) | 3 (0.1%) |
|  |  | Austrodoris (n = 1) |  |  |  |  |  | 1 (0.2%) |  |  |
|  |  | Cuthona (n = 1) |  |  |  |  |  | 1 (0.2%) |  |  |
|  |  | Nudibranchia (n = 1) | 1 (2.2%) |  |  |  |  |  |  |  |
|  | **Patellogastropoda** | Nacella (n = 77) | 29 (63%) | 28 (19.3%) | 18 (4.3%) | 1 (0.5%) |  |  |  | 1 (0%) |
| **Nemertea** | **Heteronemertea** | Parborlasia (n = 2025) |  |  | 15 (3.6%) | 17 (7.8%) | 7 (6.8%) | 30 (5.1%) | 272 (13.6%) | 1684 (52.5%) |
| **Perciformes** | **Actinopterygii** | Notothenia (n = 3) | 1 (2.2%) |  | 2 (0.5%) |  |  |  |  |  |
| **Polychaeta** | **Polychaeta** | Flabegraviera (n = 3) |  |  |  |  |  |  |  | 3 (0.1%) |
|  |  | Polychaeta (n = 55) |  |  |  |  |  | 54 (9.3%) |  | 1 (0%) |
|  |  | Terebellid (n = 60) |  |  | 1 (0.2%) |  | 8 (7.8%) | 6 (1%) | 27 (1.4%) | 18 (0.6%) |
| **Porifera** | **Dendrochirotida** | Dendrilla (n = 3) |  |  | 3 (0.7%) |  |  |  |  |  |
|  | **Haplosclerida** | Haliclona (n = 4) |  |  |  |  |  |  | 4 (0.2%) |  |
|  |  | Hemigellius (n = 10) |  |  |  |  |  |  | 7 (0.4%) | 3 (0.1%) |
|  |  | Microxina (n = 13) |  |  | 1 (0.2%) |  |  | 1 (0.2%) | 6 (0.3%) | 5 (0.2%) |
|  | **Lyssacinosida** | Rossella (n = 97) |  |  |  | 1 (0.5%) | 1 (1%) | 5 (0.9%) | 40 (2%) | 50 (1.6%) |
|  | **Poecilosclerida** | Mycale (n = 4) |  |  |  |  |  |  | 4 (0.2%) |  |
|  | **Polymastiida** | Polymastia (n = 2) |  | 1 (0.7%) |  |  |  |  | 1 (0.1%) |  |
|  |  | Polymastiidae (n = 12) |  |  | 1 (0.2%) |  |  | 2 (0.3%) | 1 (0.1%) | 8 (0.2%) |
|  | **Porifera** | Bioluminescence (n = 3) |  |  | 1 (0.2%) |  | 1 (1%) |  |  | 1 (0%) |
|  |  | Polymastia (n = 1) |  |  | 1 (0.2%) |  |  |  |  |  |
|  |  | Porifera (n = 91) |  | 1 (0.7%) | 18 (4.3%) | 3 (1.4%) | 1 (1%) | 7 (1.2%) | 35 (1.8%) | 26 (0.8%) |
|  | **Suberitida** | Homaxinella (n = 4) |  |  |  |  |  |  | 2 (0.1%) | 2 (0.1%) |
|  |  | Suberites (n = 164) |  | 1 (0.7%) | 3 (0.7%) | 3 (1.4%) | 2 (1.9%) | 14 (2.4%) | 72 (3.6%) | 69 (2.2%) |
|  | **Tetractinellida** | Antarctotetilla (n = 24) |  | 3 (2.1%) | 3 (0.7%) | 3 (1.4%) |  |  | 9 (0.5%) | 6 (0.2%) |
|  |  | Cinachyra (n = 129) |  |  |  |  |  | 1 (0.2%) | 50 (2.5%) | 78 (2.4%) |
| **Tunicata** | **Aplousobranchia** | Clavelina (n = 83) |  |  |  |  |  | 10 (1.7%) | 42 (2.1%) | 31 (1%) |
| **Other** | **Other** | Other (n = 7) |  |  | 1 (0.2%) |  | 1 (1%) |  | 2 (0.1%) | 3 (0.1%) |

Supplementary Table 4: Seaweed taxa count per genus across 10 m depth bins in stations A3 & A4. Numbers indicate the frequency of species presence within each bin, and percentages represent each species’ contribution to the total within that bin.

| **Phylum** | **Order** | **Genus** |  |  |  | **Depth (m)** | |  |  |  |
| --- | --- | --- | --- | --- | --- | --- | --- | --- | --- | --- |
|  |  |  | **0-10** | **10-20** | **20-30** | **30-40** | **40-50** | **50-60** | **60-70** | **70-80** |
| **Chlorophyta** | **Chlorophyceae** | Acrosiphonia (n = 19) |  | 1 (0.8%) | 10 (3%) | 5 (6.7%) | 3 (8.3%) |  |  |  |
|  |  | Chlorophyta (n = 1) |  |  |  |  |  |  |  | 1 (1.3%) |
|  |  | Ulothrix (n = 92) |  | 12 (9.8%) | 38 (11.3%) | 13 (17.3%) | 8 (22.2%) | 7 (87.5%) | 14 (36.8%) |  |
|  | **Ulvophyceae** | Lambia (n = 3) |  | 1 (0.8%) | 1 (0.3%) | 1 (1.3%) |  |  |  |  |
|  |  | Monostroma (n = 17) |  | 4 (3.3%) | 8 (2.4%) | 5 (6.7%) |  |  |  |  |
| **CrCA** | **CrCA** | Lithothamnion (n = 4) | 1 (4.5%) | 2 (1.6%) | 1 (0.3%) |  |  |  |  |  |
|  |  | OCrustosas (n = 5) |  | 1 (0.8%) | 4 (1.2%) |  |  |  |  |  |
|  |  | PCrustosas (n = 30) | 4 (18.2%) | 13 (10.6%) | 13 (3.9%) |  |  |  |  |  |
|  |  | TCrustosas (n = 1) |  |  | 1 (0.3%) |  |  |  |  |  |
| **Ochrophyta** | **Chlorophyta** | Ascoseira (n = 14) | 2 (9.1%) | 4 (3.3%) | 7 (2.1%) |  | 1 (2.8%) |  |  |  |
|  |  | Codium (n = 5) |  | 5 (4.1%) |  |  |  |  |  |  |
|  | **Desmarestiales** | Desmarestia (n = 107) | 7 (31.8%) | 20 (16.3%) | 35 (10.4%) | 2 (2.7%) |  |  | 8 (21.1%) | 35 (44.3%) |
|  |  | Himantotalus (n = 108) | 4 (18.2%) | 22 (17.9%) | 56 (16.6%) | 9 (12%) | 4 (11.1%) |  | 3 (7.9%) | 10 (12.7%) |
|  |  | Ochrophyta (n = 14) |  | 1 (0.8%) | 5 (1.5%) | 1 (1.3%) |  |  | 3 (7.9%) | 4 (5.1%) |
|  |  | Phaeurus (n = 2) |  |  |  | 2 (2.7%) |  |  |  |  |
|  | **Diatoma** | Diatoma (n = 37) | 4 (18.2%) | 7 (5.7%) | 11 (3.3%) | 9 (12%) | 6 (16.7%) |  |  |  |
|  |  | Ochrophyta (n = 2) |  | 1 (0.8%) | 1 (0.3%) |  |  |  |  |  |
|  |  | Petalonia (n = 2) |  |  | 2 (0.6%) |  |  |  |  |  |
|  | **Ochrophyta** | Codium (n = 6) |  |  | 6 (1.8%) |  |  |  |  |  |
|  | **Sphacelariales** | Halopteris (n = 1) |  | 1 (0.8%) |  |  |  |  |  |  |
| **Rhodophyta** | **Ceramiales** | Georgiella (n = 65) |  | 5 (4.1%) | 34 (10.1%) | 7 (9.3%) | 3 (8.3%) | 1 (12.5%) | 6 (15.8%) | 9 (11.4%) |
|  |  | Myriogramme (n = 1) |  |  |  |  |  |  |  | 1 (1.3%) |
|  | **Gigartinales** | Gigarti (n = 30) |  | 5 (4.1%) | 13 (3.9%) | 7 (9.3%) | 4 (11.1%) |  |  | 1 (1.3%) |
|  |  | Iridaea (n = 14) |  | 1 (0.8%) | 11 (3.3%) |  |  |  |  | 2 (2.5%) |
|  |  | Pantoneura (n = 6) |  |  | 3 (0.9%) | 1 (1.3%) | 1 (2.8%) |  |  | 1 (1.3%) |
|  |  | Phyllophora (n = 2) |  |  | 2 (0.6%) |  |  |  |  |  |
|  | **Gracilariales** | Curdiea (n = 33) |  | 4 (3.3%) | 19 (5.6%) | 5 (6.7%) | 3 (8.3%) |  |  | 2 (2.5%) |
|  | **Palmariales** | Palmaria (n = 27) |  | 5 (4.1%) | 17 (5%) | 3 (4%) | 1 (2.8%) |  |  | 1 (1.3%) |
|  | **Plocamiales** | Plocamiales (n = 58) |  | 5 (4.1%) | 30 (8.9%) | 5 (6.7%) | 2 (5.6%) |  | 4 (10.5%) | 12 (15.2%) |
|  |  | Rhodophyta (n = 5) |  | 1 (0.8%) | 4 (1.2%) |  |  |  |  |  |
|  |  | Trematocarpus (n = 7) |  | 2 (1.6%) | 5 (1.5%) |  |  |  |  |  |

Supplementary Table 5: Linear regression results over the 10 m binned depth range of stations A3 & A4.

| **Response** | **Predictor** | **Estimate** | **SE** | **t-value** | **p-value** | **R²** |
| --- | --- | --- | --- | --- | --- | --- |
| **FAUNA** | | | | | | |
| **Richness** | Intercept | -2.252 | 0.534 | -4.218 | **0.000** | 0.735 |
|  | Depth | 0.258 | 0.011 | 23.033 | **0.000** | 0.735 |
| **Abundance** | Intercept | -25.899 | 4.517 | -5.734 | **0.000** | 0.549 |
|  | Depth | 1.444 | 0.095 | 15.246 | **0.000** | 0.549 |
| **SEAWEED** | | | | | | |
| **Richness** | Intercept | 6.502 | 0.292 | 22.241 | **0.000** | 0.339 |
|  | Depth | -0.061 | 0.006 | -9.421 | **0.000** | 0.339 |

**Biodiversity measurements**

Supplementary Table 6 & 7: Results of general mixed linear model for total abundance (*N*), species richness (*S′*), and Simpson’s biodiversity index (*D*) ± SE, grouped by 10 m depth increments and distance from the glacier for faunal species. Data from four replicate frames are averaged per depth bin.

| **Term** | **df** | **Sum of sq** | **Mean of sq** | **F-value** | **p-value** |
| --- | --- | --- | --- | --- | --- |
| **TOTAL ABUNDANCE** | | | | | |
| **Depth** | 1 | 387085.400 | 387085.400 | 166.323 | **0.000** |
| **Distance** | 1 | 132309.000 | 132309.000 | 56.851 | **0.000** |
| **Depth:Distance** | 1 | 456859.700 | 456859.700 | 196.304 | **0.000** |
| **Residuals** | 141 | 328150.900 | 2327.311 |  |  |
| **SPECIES RICHNESS** | | | | | |
| **Depth** | 1 | 2266.740 | 2266.740 | 221.597 | **0.000** |
| **Distance** | 1 | 3654.755 | 3654.755 | 357.289 | **0.000** |
| **Depth:Distance** | 1 | 3856.342 | 3856.342 | 376.996 | **0.000** |
| **Residuals** | 141 | 1442.308 | 10.229 |  |  |
| **SIMPSON'S DIVERSITY INDEX** | | | | | |
| **Depth** | 1 | 0.012 | 0.012 | 0.662 | 0.417 |
| **Distance** | 1 | 1.258 | 1.258 | 70.159 | **0.000** |
| **Depth:Distance** | 1 | 0.110 | 0.110 | 6.135 | **0.014** |
| **Residuals** | 141 | 2.528 | 0.018 |  |  |

| **Response** | **Predictor** | **Estimate** | **SE** | **t-value** | **p-value** | **R²** |
| --- | --- | --- | --- | --- | --- | --- |
| **FAUNA** | | | | | | |
| **Richness** | Intercept | -2.252 | 0.534 | -4.218 | **0.000** | 0.735 |
|  | Depth | 0.258 | 0.011 | 23.033 | **0.000** | 0.735 |
| **Abundance** | Intercept | -25.899 | 4.517 | -5.734 | **0.000** | 0.549 |
|  | Depth | 1.444 | 0.095 | 15.246 | **0.000** | 0.549 |
| **SEAWEED** | | | | | | |
| **Richness** | Intercept | 6.502 | 0.292 | 22.241 | **0.000** | 0.339 |
|  | Depth | -0.061 | 0.006 | -9.421 | **0.000** | 0.339 |

**Canonical Component Analysis**

Supplementary Table 8: Canonical Component Analysis with water properties from bottom CTD values gathered on December 21st, 2024, and seaweed presence as explaining environmental factors. General results.

| **Component** | **Inertia** | **Proportion** |
| --- | --- | --- |
| **Total** | 1.842 | 1.000 |
| **Constrained** | 1.600 | 0.869 |
| **Unconstrained** | 0.241 | 0.131 |

Supplementary Table 9: Canonical Component Analysis with water properties from bottom CTD values gathered on December 21st, 2024, and seaweed presence as explaining environmental factors. Overall importance of components.

| **Metric** | **CCA1** | **CCA2** | **CCA3** | **CCA4** | **CCA5** | **CCA6** | **CCA7** | **CCA8** | **CA1** | **CA2** | **CA3** | **CA4** |
| --- | --- | --- | --- | --- | --- | --- | --- | --- | --- | --- | --- | --- |
| **Eigenvalue** | 0.608 | 0.529 | 0.193 | 0.181 | 0.053 | 0.026 | 0.007 | 0.002 | 0.150 | 0.062 | 0.015 | 0.014 |
| **Proportion Explained** | 0.330 | 0.287 | 0.105 | 0.098 | 0.029 | 0.014 | 0.004 | 0.001 | 0.081 | 0.034 | 0.008 | 0.008 |
| **Cumulative Proportion** | 0.330 | 0.618 | 0.723 | 0.821 | 0.850 | 0.864 | 0.868 | 0.869 | 0.950 | 0.984 | 0.992 | 1.000 |

Supplementary Table 10: Canonical Component Analysis with water properties from bottom CTD values gathered on December 21st, 2024, and seaweed presence as explaining environmental factors. Accumulated constrained eigenvalues.

| **Metric** | **CCA1** | **CCA2** | **CCA3** | **CCA4** | **CCA5** | **CCA6** | **CCA7** | **CCA8** |
| --- | --- | --- | --- | --- | --- | --- | --- | --- |
| **Eigenvalue** | 0.608 | 0.529 | 0.193 | 0.181 | 0.053 | 0.026 | 0.007 | 0.002 |
| **Proportion Explained** | 0.380 | 0.331 | 0.121 | 0.113 | 0.033 | 0.016 | 0.004 | 0.001 |
| **Cumulative Proportion** | 0.380 | 0.711 | 0.832 | 0.945 | 0.978 | 0.994 | 0.999 | 1.000 |

**Functional traits**

Supplementary Table 11: Results of two-way ANOVA with interaction on adult mobility and larvae dispersal.

| **Term** | **df** | **Sum Sq** | **Mean Sq** | **F-value** | **p-value** |
| --- | --- | --- | --- | --- | --- |
| **ADULT MOBILITY** | | | | | |
| **Depth** | 6 | 55.531 | 9.255 | 169.904 | **0.000** |
| **Distance** | 3 | 43.218 | 14.406 | 264.461 | **0.000** |
| **Depth:Distance** | 14 | 7.004 | 0.500 | 9.184 | **0.000** |
| **Residuals** | 237 | 12.910 | 0.054 |  |  |
| **LARVAE TYPE** | | | | | |
| **Depth** | 6 | 4.905 | 0.817 | 27.433 | **0.000** |
| **Distance** | 3 | 1.776 | 0.592 | 19.868 | **0.000** |
| **Depth:Distance** | 14 | 2.332 | 0.167 | 5.589 | **0.000** |
| **Residuals** | 237 | 7.062 | 0.030 |  |  |

Supplementary Table 12: Results of PERMANOVA on all fauna feeding types.

|  | **df** | **Sum Sq** | **R2** | **Pillai** | **F-value** | **Pr(>F)** |
| --- | --- | --- | --- | --- | --- | --- |
| **Depth** | 3 | 10.072 | 0.460 | 1.384 | 143.077 | **0.000** |
| **Distance** | 3 | 4.040 | 0.184 | 1.039 | 57.384 | **0.000** |
| **Depth:Distance** | 7 | 1.697 | 0.077 | 1.147 | 10.329 | **0.000** |
| **Residuals** | 260 | 6.101 | 0.279 |  |  |  |
